# Supplementary material
Source: Elsevier journal article supplement (https://www.sciencedirect.com/science/article/pii/S1888989116300209)
Supplement: mmc1 [file S1888989116300209:mmc1.docx]

**Tabla 2 Descripción detallada de los factores asociados a la presencia de malestar psicológico o trastornos mentales comunes entre migrantes**

| **Autores, año de publicación, referencia, país de inmigración** | **Muestra y región de origen** | **Diseño del estudio**  **Análisis estadístico** | **Variable dependiente principal**  **Medidas** | **Factores asociados** |
| --- | --- | --- | --- | --- |
| **Estudios realizados en EE.UU. y Canadá** | | | | |
| Alderete et al. 20007, EE.UU. | 1.001 migrantes mexicanos trabajadores agrícolas | Transversal  Regresión logística | Trastornos psiquiátricos  UMCIDI | Estrés por aculturación |
| Ali 20021, Canadá | 18.610 migrantes de diferentes países | Transversal  Regresión logística | Síntomas depresivos (prevalencia a los 12 meses) | Tiempo de permanencia en el nuevo país |
| Shen and Takeuchi 200193, EE.UU. | 939 migrantes chinos americanos | Transversal  Análisis de senderos | Síntomas depresivos  SCL-90R | Estrés por aculturación |
| Hovey and Magaña 200265, EE.UU. | 95 migrantes mexicanos trabajadores agrícolas | Transversal  Regresión múltiple | Trastornos de ansiedad  PAI | Nivel educativo; estrés por aculturación ; razón para migración |
| Grzywacz et al. 200688, EE.UU. | 60 migrantes latinos trabajadores agrícolas (hombres) | Transversal  Regresión múltiple | Trastornos de ansiedad, PAI  Síntomas depresivos, CES-D  Abuso de alcohol, CAGE | Vivir solo o separado de la familia en el nuevo país |
| Gee et al. 2006107, EE.UU. | 112 descendientes de migrantes africanos  202 migrantes mexicanos americanos  274 otros migrantes latinos | Transversal  Regresión múltiple | Bienestar psicológico  MSC12 | Discriminación social percibida |
| Alegría et al. 200714, EE.UU. | 1630 migrantes latinos | Transversal  Regresión logística | Trastornos psiquiátricos  CIDI/DSM-IV | Dominio del idioma |
| Williams et al. 200745, EE.UU. | 3.570 afroamericanos  1.621 caribeños de raza negra  891 blancos no hispanos | Transversal  Regresión logística | Trastorno depresivo mayor  WMH-CIDI | Sexo (mujer) en afroamericanos |
| Hiott et al. 200895, EE.UU. | 125 migrantes latinos trabajadores agrícolas (hombres) | Transversal  Regresión múltiple | Trastornos de ansiedad, PAI  Síntomas depresivos, CES-D | Aculturación; condiciones laborales |
| de Castro et al. 2008118, EE.UU. | 1.381 migrantes filipinos | Transversal  Regresión múltiple | Malestar psicológico  SCL-90-R | Condiciones laborales |
| Ding and Hargraves 200998, EE.UU. | 2.607 migrantes*  26.905 ciudadanos de EE.UU. | Transversal  Regresión logística | Infelicidad, depresión y ansiedad  SF-12 | Dominio del idioma |
| Potochnick et al. 2010103, EE.UU. | 281 migrantes latinos de primera generación jóvenes de 12–19 años | Transversal  Regresión por mínimos cuadrados | Depresión, CDI  Ansiedad, MASC-10 | Apoyo de la familia y de los profesores |
| Breslau et al. 201150, EE.UU. | 554 migrantes mexicanos  2.519 miembros familiares no migrantes en México | Transversal  Regresión logística | Síntomas depresivos y de ansiedad  CIDI; WMH-CIDI | Edad (joven); apoyo social |

**Tabla 2 (cont.)****Descripción detallada de los factores asociados a la presencia de malestar psicológico o trastornos mentales comunes entre migrantes**

| **Autores, año de publicación, bibliografía, país de inmigración** | **Muestra y región de origen** | **Diseño del estudio**  **Análisis estadístico** | **Variable dependiente principal**  **Medidas** | **Factores asociados** |
| --- | --- | --- | --- | --- |
| **Estudios realizados en EE.UU. y Canadá (continuación)** | | | | |
| Ornelas and Perreira 201177, EE.UU. | 281 migrantes latinos | Transversal  Regresión logística | Síntomas depresivos  PHQ-9; CES-D | Nivel de pobreza alto previo a la migración; vivir en compañía de la familia en el nuevo país; apoyo social y familismo; discriminación social percibida |
| Lueck and Wilson 201181, EE.UU. | 2.059 migrantes latinos (868 mexicanos, 577 cubanos y 614 otros latinos) | Transversal  Regresión múltiple | Estrés por aculturación  Entrevista de ocho preguntas | Tipo de migración; dominio del idioma; discriminación social percibida |
| Gong et al. 201185, EE.UU. | 1.639 migrantes asiáticos | Transversal  Regresión por mínimos cuadrados  Regresión logística | Malestar psicológico  Escala K10 de Kessler  Síntomas depresivos y de ansiedad en los últimos 12 meses | Razón para migración; vivir en compañía de la familia en el nuevo país; funcionamiento familiar malo |
| Rasmussen et al. 201283, EE.UU. | 3.260 migrantes latinos y asiáticos | Transversal  Regresión logística | Sucesos traumáticos; inicio de episodio de depresión mayor  WMH-CIDI | Tipo de migración |
| Park et al. 201297, EE.UU. | 500 migrantes coreanos | Transversal  Análisis de senderos | Síntomas depresivos  CES-D | Estrés por aculturación |
| Patterson et al. 201353, Canadá | 4.946 migrantes de otras zonas América del Norte, Oceanía, América Central y del Sur y región del Caribe, Europa, África, Asia | Transversal  Regresión logística | Trastornos del ánimo, de ansiedad y de uso de sustancias  WMH-CIDI | Edad de migración (joven) |
| Lee et al. 201373, EE.UU. | 123 migrantes mexicanos indígenas | Transversal  Regresión múltiple  Análisis de senderos | Síntomas depresivos  PHQ-9 | Autoestima (baja); discriminación social percibida |
| Torres and Wallace 201384, EE.UU. | 1.603 migrantes latinos | Transversal  Regresión logística | Malestar psicológico  Escala K10 de Kessler | Razón para migración |
| Zhang and Hong 2013114, EE.UU. | 2.085 migrantes; 23,7% asiáticos americanos, 76,3% migrantes asiáticos | Transversal  Regresión por mínimos cuadrados | Malestar psicológico  Escala K10 de Kessler | Discriminación social percibida |
| Islam et al. 201436, Canadá | 265.056 surasiáticos nacidos en Canadá  997.706 migrantes | Transversal  Regresión logística | Trastornos del ánimo y de ansiedad  Salud mental auto-percibida | Sexo (mujer); edad de migración (joven); no tener niños (<12 años) en el hogar; dominio del idioma |

**Tabla 2 (cont.) Descripción detallada de los factores asociados a la presencia de malestar psicológico o trastornos mentales comunes entre migrantes**

| **Autores, año de publicación, bibliografía, país de inmigración** | **Muestra y región de origen** | **Diseño del estudio**  **Análisis estadístico** | **Variable dependiente principal**  **Medidas** | **Factores asociados** |
| --- | --- | --- | --- | --- |
| **Estudios realizados en Europa** | | | | |
| Pantelidou et al. 2006102, Reino Unido | 133 estudiantes griegos en la Universidad de Londres | Transversal  Regresión múltiple | Choque cultural, Culture Shock Questionnaire  Disforia, GHQ-12 | Apoyo social; número de amigos íntimos |
| Weich et al. 200422, Reino Unido | 837 europeos blancos  3.444 migrantes: 733 irlandeses; 724 pakistaníes; 694 caribeños negros; 650 bangladesíes y 643 indios | Transversal  Regresión logística | Trastornos mentales comunes  CIS-R | Región de origen |
| Thapa 200542, Noruega | 1.536 migrantes de países de bajo y medio nivel de ingresos | Transversal  Regresión múltiple | Malestar psicológico  HSCL-10 | Sexo (mujer); edad (mayor); región de origen; vivir solo o separado de la familia en el nuevo país; sucesos traumáticos a lo largo de la vida; desempleo |
| Ryan et al. 200662, Reino Unido | 360 migrantes irlandeses | Longitudinal (caso-control)  Regresión logística | Depresión  BDI | Nivel educativo; razón para migrar; apoyo social; desempleo |
| Tinghög et al. 200756, Suecia | 1.109 migrantes (escandinavos nacidos fuera de Suecia, europeos nacidos fuera de Escandinavia, no europeos)  9.314 no migrantes | Transversal  Regresión logística | Bienestar subjetivo  WHO (ten) Wellbeing Index  Depresión  MDI | Región de origen |
| Wittig et al. 200816, Alemania | 140 migrantes polacos y 88 vietnamitas  772 alemanes del Este y 811 del Oeste | Transversal  Análisis multivariante de la varianza (MANOVA) | Ansiedad y depresión  HADS | Sexo (mujer); región de origen |
| de Wit et al. 200817, Países Bajos | 509 migrantes (231turcos; 191 marroquíes; 87 surinamés y antillanos)  321 alemanes | Transversal  Regresión logística | Trastornos depresivos y de ansiedad  CIDI | Sexo (mujer) entre las migrantes turcas; región de origen |
| Taloyan et al. 200820, Suecia | 197 migrantes kurdos  1.407 suecos | Transversal  Regresión logística | Bienestar psicológico  Cuestionario 2 preguntas | Sexo (mujer) |
| Taloyan et al. 200838, Suecia | 197 migrantes kurdos de Irán (22) y Turquía (175) | Transversal  Regresión logística | Malestar psicológico  Cuestionario 5 preguntas | Sexo (mujer) |
| Irfaeya et al. 200899, Alemania | 116 mujeres migrantes árabes | Transversal  Regresión múltiple | Malestar psicológico  SCL-90-R | Tiempo de permanencia en el nuevo país; discriminación social percibida |

**Tabla 2 (cont.)Descripción detallada de los factores asociados a la presencia de malestar psicológico o trastornos mentales comunes entre migrantes**

| **Autores, año de publicación, bibliografía, país de inmigración** | **Muestra y región de origen** | **Diseño del estudio**  **Análisis estadístico** | **Variable dependiente principal**  **Medidas** | **Factores asociados** |
| --- | --- | --- | --- | --- |
| **Estudios realizados en Europa (continuación)** | | | | |
| Levecque et al. 200919, Bélgica | 147 migrantes turcos  359 migrantes marroquíes | Transversal  Regresión logística | Malestar psicológico  SCL-90-R | Sexo (mujer) |
| Gater et al. 200923, Reino Unido | 932 migrantes pakistaníes  924 migrantes europeos blancos | Longitudinal  Regresión logística | Trastornos depresivos  ICD-10; DSM-IV | Sexo (mujer) |
| Rodríguez Álvarez et al. 2009105, España | 1. 239 marroquíes en Marruecos  149 migrantes marroquíes en País Vasco; 1.388 nacidos en País Vasco | Transversal  Regresión logística | Síntomas depresivos y ansiedad  MHI | Apoyo social |
| Llácer et al. 2009112, España | 570 migrantes ecuatorianos | Transversal  Regresión logística | Posible caso psiquiátrico  GHQ-28 | Discriminación social percibida |
| Tinghög et al. 201043, Suecia | 211 migrantes finlandeses  250 migrantes iraníes  259 migrantes iraquíes | Transversal  Regresión logística | Bienestar subjetivo  WHO (ten) Wellbeing Index | Sexo (mujer); estado civil (soltero); aculturación; desempleo; nivel socioeconómico; sucesos traumáticos previos a la migración; apoyo social |
| Norredam et al. 201087, Dinamarca | 31.923 migrantes  127.687 daneses | Longitudinal  Regresión de Poisson | Trastornos mentales  ICD-10 | Vivir en compañía de la familia en el nuevo país |
| Borrell et al. 2010111, España | 6938 migrantes* | Transversal  Regresión logística | Salud mental  GHQ-12 | Discriminación social percibida |
| Del Amo et al. 201126, España | 554 españoles  568 migrantes ecuatorianos | Transversal  Regresión logística | Posible caso psiquiátrico  GHQ-28 | Sexo (mujer); apoyo social |
| Gonidakis et al. 201194, Grecia | 317 migrantes europeos y de Asia central y occidental | Transversal  Regresión logística | Síntomas depresivos  CES-D | Aculturación |
| Agudelo-Suárez et al. 2011113, España | 2.434 migrantes trabajadores marroquíes, ecuatorianos, rumanos y colombianos | Transversal  Regresión logística | Salud mental  GHQ-12 | Discriminación social percibida |
| Villarroel y Artazcoz 201228, España | 620 migrantes latinoamericanos  18.872 españoles | Transversal  Regresión logística | Salud mental  GHQ-12 | Sexo (hombre); región de origen |
| Mundt et al. 201240, Alemania | 74 migrantes de Europa, Turquía, países árabes, antigua Yugoslavia, antigua Unión Soviética y Vietnam  48 no migrantes | Transversal  Regresión logística | Malestar psicológico  GHQ-28 | Sexo (mujer); edad (joven); vivir solo o separado de la familia en el nuevo país |

**Tabla 2 (cont.)Descripción detallada de los factores asociados a la presencia de malestar psicológico o trastornos mentales comunes entre migrantes**

| **Autores, año de publicación, bibliografía, país de inmigración** | **Muestra y región de origen** | **Diseño del estudio**  **Análisis estadístico** | **Variable dependiente principal**  **Medidas** | **Factores asociados** |
| --- | --- | --- | --- | --- |
| **Estudios realizados en Europa (continuación)** | | | | |
| Aichberger et al. 201267, Alemania | 205 mujeres migrantes turcas  200 mujeres no migrantes alemanas | Transversal  Regresión múltiple | Malestar psicológico  GHQ-28 | Nivel socioeconómico; desempleo |
| Drogendijk et al. 201296, Países Bajos | 221mgrantes turcos afectados por desastres  127 migrantes no afectados | Transversal  Regresión múltiple | Ansiedad, depresión, hostilidad y síntomas somáticos  SCL-90-R, síntomas de TEPT, IES | Aculturación |
| Kerkenaar et al. 201324, Austria | 518 migrantes de Europa del Este  2930 no migrantes | Transversal  Regresión logística | Depresión y ansiedad  PHQ-4 | Región de origen |
| Jarrín et al. 201339, España | 568 migrantes ecuatorianos | Transversal  Regresión logística | Posible caso psiquiátrico  GHQ-28 | Sexo (mujer) |
| Das-Munshi et al. 201351, Britain | 17.000 niños irlandeses de segunda generación nacidos en Gran Bretaña | Longitudinal  Regresión logística | Salud psicológica  Bristol Social Adjustment Guide Rutter B; Rutter A | Edad (infancia) |
| Qureshi et al. 201355, España | 1.503 migrantes de Latinoamérica, África subsahariana, Europa del Este y Asia  1.503 non migrantes | Transversal  Regresión logística | Morbilidad psiquiátrica  MINI | Región de origen; estado civil (sin pareja); nivel educativo |
| Saheer et al. 201357, Noruega | 1.047 migrantes de Turquía, Sri Lanka, Irán, Pakistán, Vietnam | Transversal  Regresión logística | Trastorno afectivo estacional  SPAQ | Región de origen |
| Ladin y Reinhold 201366, Austria, Alemania, Francia, Suiza, Bélgica, Suecia, Dinamarca, España, Países Bajos, Italia, Grecia, Israel | 12.247 migrantes de Alemania, Italia, Marruecos, Turquía y Argelia | Transversal  Regresión logística | Síntomas depresivos  EURO-D | Nivel socioeconómico; apoyo social |
| Jurado et al. 201429, España | 458 mujeres migrantes de Latino América, Marruecos y otros países del norte de África y Europa del este entre otros  448 mujeres no migrantes españolas | Transversal  Regresión logística | Trastornos mentales comunes  K6-scale of Kessler | Edad (mayor); región de origen; vivir en compañía de la familia en el nuevo país; tiempo de permanencia en el nuevo país; apoyo social |
| Morawa and Erim 201441, Alemania | 471 migrantes turcas (254 pacientes de atención primaria y 217 pacientes ambulatorios psicosomáticos) | Transversal  Regresión múltiple | Síntomas depresivos  BDI | Sexo (mujer); nivel educativo; aculturación; dominio del idioma |
| Mölsä et al. 201476, Finlandia | 128 refugiados somalíes  128 no migrantes | Transversal  Regresión múltiple | Síntomas depresivos, BDI  Malestar psicológico, GHQ-12  Calidad de vida, HRQoL | Sucesos traumáticos previos a la migración |
| Heeren et al 201482, Suiza | 65 demandantes de asilo; 34 refugiados; 21 ilegales; 26 migrantes trabajadores; 56 residentes suizos | Transversal  Regresión logística | Ansiedad y depresión, HSCL-25  Estrés postraumático, PDS | Tipo de migración |

**Tabla 2 (cont.)Descripción detallada de los factores asociados a la presencia de malestar psicológico o trastornos mentales comunes entre migrantes**

| **Autores, año de publicación, bibliografía, país de inmigración** | **Muestra y región de origen** | **Diseño del estudio**  **Análisis estadístico** | **Variable dependiente principal**  **Medidas** | **Factores asociados** |
| --- | --- | --- | --- | --- |
| **Estudios realizados en Asia** | | | | |
| Ristner et al. 200137, Israel | 1.062 migrantes judíos de la Antigua Unión Soviética (AUS) | Transversal  Regresión múltiple  MANOVA | Malestar psicológico  DPSI | Sexo (mujer) |
| Ritsner y Ponizovsky 200348, Israel | 563 migrantes judíos de la AUS | Transversal  y parcialmente longitudinal  Regresión múltiple | Malestar psicológico  TBDI | Edad (mayor) |
| Griffin et al. 200349, Israel | 221 hombres migrantes tailandeses | Transversal  Regresión múltiple | Malestar psicológico  Escala de 9 item | Edad (joven); aculturación; apoyo social; condiciones laborales |
| Lerner et al. 200574, Israel | 600 migrantes de la AUS | Longitudinal  Regresión logística | Malestar psicológico  PERI-D | Locus de control (externo); aculturación; funcionamiento familiar malo; apoyo social |
| Mirsky et al. 200830, Israel | 844 migrantes de la AUS  2.114 judíos nacidos en Israel | Transversal  Regresión logística | Malestar psicológico  GHQ-12 | Sexo (mujer) |
| Wong et al. 200846, China | 475 trabajadores migrantes desde zonas rurales a urbanas | Transversal  Regresión logística | Salud mental  BSI | Sexo (hombre); estado civil (hombres casados); condiciones laborales |
| Wong et al. 200886, China | 475 trabajadores migrantes desde zonas rurales a urbanas | Transversal  Regresión múltiple | Salud mental  BSI | Razón para migración; condiciones laborales |
| Chou 200971, China | 449 trabajadores migrantes desde zonas rurales a urbanas | Transversal  Regresión múltiple | Síntomas depresivos  CES-D | Optimismo; sentimiento de control; razón para migrar; apoyo social |
| Zhang et al. 2009108, China | 1.006 trabajadores migrantes desde zonas rurales a urbanas | Transversal  Modelo de ecuación estructural | Salud psicológica  WHOQOL-BREF | Discriminación social percibida |
| Wong et al. 2009115, China | 625 niños de trabajadores migrantes desde zonas rurales a urbanas | Transversal  Regresión logística | Trastornos de ansiedad y trastorno depresivo, RCADS | Discriminación social percibida |
| Hwang et al. 201078, China | 975 migrantes internos  555 no migrantes | Longitudinal  Regresión múltiple | Síntomas depresivos  CES-D | Tipo de migración |
| Lu 201089, Indonesia | 5.380 trabajadores migrantes desde zonas rurales a urbanas  5.392 migrantes de otro tipo | Longitudinal  Regresión logística | Síntomas depresivos  IFLS | Vivir solo o separado de la familia en el nuevo país |
| Wang et al. 2010109, China | 1.006 trabajadores migrantes desde zonas rurales a urbanas | Transversal  Análisis de senderos | Malestar psicológico, SCL-90 | Discriminación social percibida |

**Tabla 2 (cont.)Descripción detallada de los factores asociados a la presencia de malestar psicológico o trastornos mentales comunes entre migrantes**

| **Autores, año de publicación, bibliografía, país de inmigración** | **Muestra y región de origen** | **Diseño del estudio**  **Análisis estadístico** | **Variable dependiente principal**  **Medidas** | **Factores asociados** |
| --- | --- | --- | --- | --- |
| **Estudios realizados en Asia (continuación)** | | | | |
| Lin et al. 2011110, China | 1.006 trabajadores migrantes desde zonas rurales a urbanas | Transversal  Regresión múltiple | Malestar psicológico  SCL-90 | Discriminación social percibida |
| Yang et al. 201258, China | 1.595 hombres trabajadores migrantes desde zonas rurales a urbanas | Transversal  Regresión logística | Estrés percibido, CPSS  Probable trastorno mental ,CHQ | Estado civil (soltero); autoestima; vivir solo en el nuevo país |
| Chou 2012104, China | 347 migrantes internos | Longitudinal  Regresión múltiple | Síntomas depresivos  CES-D | Apoyo social; discriminación social percibida |
| Chen et al. 2012117, China | 210 migrantes internos | Transversal  Regresión múltiple | Trastornos mentales  SCL-90-R | Desempleo; estrategias de afrontamiento |
| He y Wong 201363, China | 959 mujeres trabajadoras migrantes desde zonas rurales a urbanas | Transversal  Regresión jerárquica lineal | Salud mental, BSI | Nivel educativo; condiciones laborales; razón para migración |
| Tsai et al. 201390, Taiwan | 157 mujeres migrantes de sudeste asiático y China continental | Transversal  Regresión múltiple | Cuestionario general de salud  SF-36 | Funcionamiento familiar bueno en el nuevo país (mejor salud mental) |
| Yu 201472, China | 1.205 migrantes internos | Transversal  Regresión múltiple | Síntomas depresivos  PHQ-9 | Elasticidad personal y familiar; estrés por aculturación; discriminación percibida |
| Yang et al. 2014106, Taiwan | 268 mujeres migrantes de China y Vietnam | Transversal  Regresión múltiple | Síntomas depresivos, BSRS | Discriminación percibida |
| **Estudios realizados en Australia, América del Sur, África** | | | | |
| Chou 200735, Australia | 431 migrantes de países asiáticos y occidentales | Longitudinal  Regresión múltiple | Malestar psicológico  GHQ-12 | Sexo (mujer); edad (mayor); región de origen; estado civil (soltero); nivel educativo; tipo de visado; vivir con la familia en el nuevo país; estudiante o económicamente inactivo |
| Andrade et al. 201244, Brasil | 5.037 brasileños; 52% migrantes desde otras áreas de Brasil a Sao Paulo | Transversal  Regresión logística | Trastornos mentales comunes  WMH-CIDI | Sexo (mujer) |
| Akinyemi et al. 201280, Nigeria | 444 refugiados de Liberia, Sierra Leona y Togo; 527 no refugiados | Transversal  Regresión logística | Salud mental, MINI  Calidad de vida  WHOQOL-BREF | Tipo de migración; desempleo; trabajadores no cualificados y cualificados |
| Ruiz-Grosso et al. 201454, Perú | 8.091 migrantes internos | Transversal  Regresión logística | Síntomas depresivos  CES-D | Edad de migración interna (< 30 años) |

**Tabla 2 (cont.)Descripción detallada de los factores asociados a la presencia de malestar psicológico o trastornos mentales comunes entre migrantes**

| **Autores, año de publicación, bibliografía, país de inmigración** | **Muestra y región de origen** | **Diseño del estudio**  **Análisis estadístico** | **Variable dependiente principal**  **Medidas** | **Factores asociados** |
| --- | --- | --- | --- | --- |
| **Revisiones sistemáticas y meta-análisis** | | | | |
| Lindert et al. 200979, distintos países con mayor y menor nivel de ingresos en los cinco continentes | 35 estudios: n = 50 - 4.558 migrantes trabajadores y refugiados, de México, Afganistán, Sudán, Irán, Irak, Corea, Camboya, Bosnia, Guatemala, Vietnam, Senegal, China, Kosovo | Revisión sistemática y meta-análisis | Depresión, ansiedad, estrés postraumático  DSM; ICD | Tipo de migración |
| Pascoe y Richman 2009116, país de inmigración* | 134 estudios: n= 30 - 8.311 migrantes* | Meta-análisis | Diferentes escalas para medir salud mental, malestar psicológico y bienestar | Discriminación social percibida |
| Das-Munshi et al. 201268, EE.UU., Canadá, Nueva Zelanda, Suecia, Países Bajos, Israel | 12 estudios: n = 18.548 migrantes de regiones escandinavas, Finlandia, EE. UU., Turquía, AUS, Oriente medio, norte de África, Irán, Iraq, sureste de Asia, centro y sur de América, y Puerto Rico | Revisión sistemática y meta-análisis | Trastornos mentales comunes Diferentes cuestionarios (CIDI, GHQ-12,SCL-90, CES-D, PERI-D) | Nivel socioeconómico (movilidad social descendente) |
| Zhong et al. 201332, China | 48 estudios: n= 42.813 migrantes desde zonas rurales a urbanas desde norte, sur, este y oeste de China | Meta-análisis | Síntomas psicológicos  SCL-90-R | Edad (joven); nivel socioeconómico |

BAI, Beck Anxiety Inventory; BDI, Beck Depression Inventory; BSI, Brief Symptom Inventory; Brief Symptom Rating Scale, BSRS; CAGE, questionnaire of alcohol abuse; CDI, Child's Depression Inventory; CES-D, Center for Epidemiological Studies–Depression; CIDI, Composite International Diagnostic Interview; CHQ, Chinese Health Questionnaire; CIS-R, Revised Clinical Interview Schedule; CHQ, Chinese Health Questionnaire; CPSS, Chinese Perceived Stress Scale; CSTAI, Children's State and Trait Anxiety Inventory; DPSI, Demographic Psychosocial Inventory; DSM-IV, Diagnostic and Statistical Manual of Mental Disorders, Fourth Edition; EURO-D 12-item scale for depressive symptoms; GHQ-12, General Health Questionnaire-12; GHQ-28, General Health Questionnaire-28; HADS, Hospital Anxiety and Depression Scale; HRQoL, Health-Related Quality of Life; HSCL-10, Hopkins Symptom Checklist; HSCL-25, Hopkins Symptom Checklist; ICD-10, International Classification of Diseases; IES, Impact of Event Scale; IFLS, Indonesia Family Life Survey; INHS, Israeli World Mental Health Survey; K10-scale of Kessler; K6-scale of Kessler; MASC-10, Multidimensional Anxiety Scale for Children; MDI, Major Depression Inventory; MHI, Mental Health Inventory-5; MINI, Mini International Neuropsychiatric Interview; MRHS, Madrid Regional Health Survey 2007; MSC12, Mental Component Summary subscale from the Medical Outcomes Study Short Form 12; PAI, Personality Assessment Inventory; PERI-D, Psychiatric Epidemiologic Research Interview; PHQ-4, Patient Health Questionnaire-4; PHQ-9, Patient Health Questionnaire-9; PRIME-MD, Primary care evaluation of mental disorders; Posttraumatic Diagnostic Scale, PDS; Revised child anxiety and depression scale (RCADS); SCL-90, Symptom Checklist-90; SCL-90R, SCL-90 Symptom Checklist-90–Revised; SF-12, Self-reported General Health; SF-36, Health survey; SPAQ, Seasonal pattern assessment questionnaire; TBDI, Talbieh Brief Distress Inventory; TEPT, trastorno de estrés postraumático; UMCIDI, University of Michigan version of Composite International Diagnostic Interview; WHOQOL-BREF, World Health Organization, Quality of Life-Brief Version; WMH-CIDI, World Mental Health CIDI.

*País de origen de los migrantes o país de inmigración no mostrados en el artículo
